# Supplementary material for: Lnk deficiency enhances translesion synthesis to alleviate replication stress and promote hematopoietic stem cell fitness
Source: JCI journal article supplement (doi:10.1172/jci191713), 2025-10-30
Supplement: sd1 [file 1]

**Supplementary figures for**

***Lnk* deficiency Enhances Translesion Synthesis to alleviate Replication Stress and Promote Hematopoietic Stem Cell Fitness**

Brijendra Singh<sup>1,2,#</sup>, Md Akram Hossain<sup>1,2,#</sup>, Xiao Hua Liang<sup>1,2</sup>, Jeremie Fages<sup>1,2</sup>, Carlo Salas Salinas<sup>1,2</sup>, Roger A. Greenberg<sup>3</sup>, and Wei Tong<sup>1,2,4,\*</sup>

<sup>1</sup> Division of Hematology, Children's Hospital of Philadelphia, Philadelphia, PA 19104

<sup>2</sup> Division of Pediatrics, Perelman School of Medicine at the University of Pennsylvania, Philadelphia, PA 19104

<sup>3</sup> Division of Cancer Biology, Perelman School of Medicine at the University of Pennsylvania, Philadelphia, PA 19104

<sup>4</sup> Lead Contact

\* Correspondence author: [tongw@chop.edu](mailto:tongw@chop.edu)

**Keywords**

Hematopoietic stem cells (HSCs), replication stress, translesion synthesis, DNA replication, DNA damage response, DNA repair, DNA damage tolerance, stem cell fitness.

**Running title:** LNK regulates replication stress in HSCs

**Figure S1, related to figure 3.**

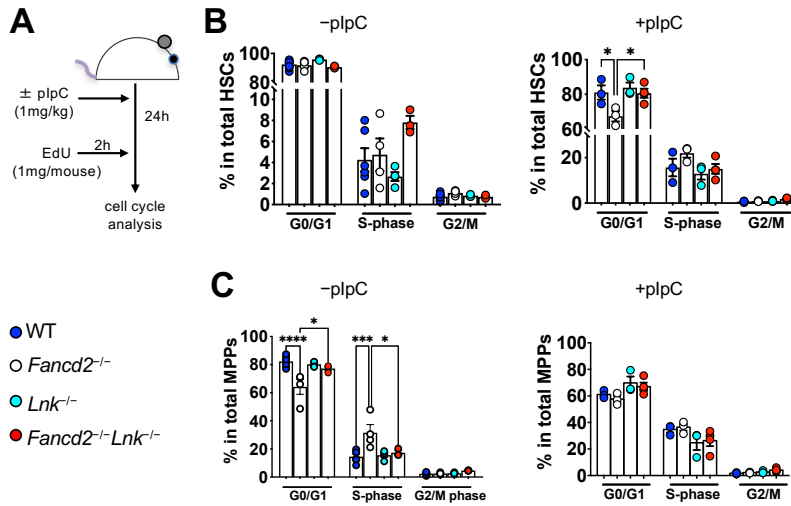

**Figure S1. Cell cycle analysis of HSCs and MPPs with and without pIpC administration. (A)** Experimental design for measuring the activation of the ATR/ATM pathway in different cell cycle stages upon pIpC-induced HSPC replication, as in Figure 2. **(B-C)** Quantification of cell cycle stages in the HSCs **(B)** and MPPs **(C)** of different genotypes of mice without and with pIpC-induced replication stress. In all relevant panels, each symbol represents an individual mouse; bars indicate mean values. Each symbol represents an individual mouse. Bars indicate mean values, and error bars indicate SEM. p values were calculated using one-way ANOVA, \*,  $p < 0.05$ ; \*\*,  $p < 0.01$ .

**Figure S2, related to Figure 3.**

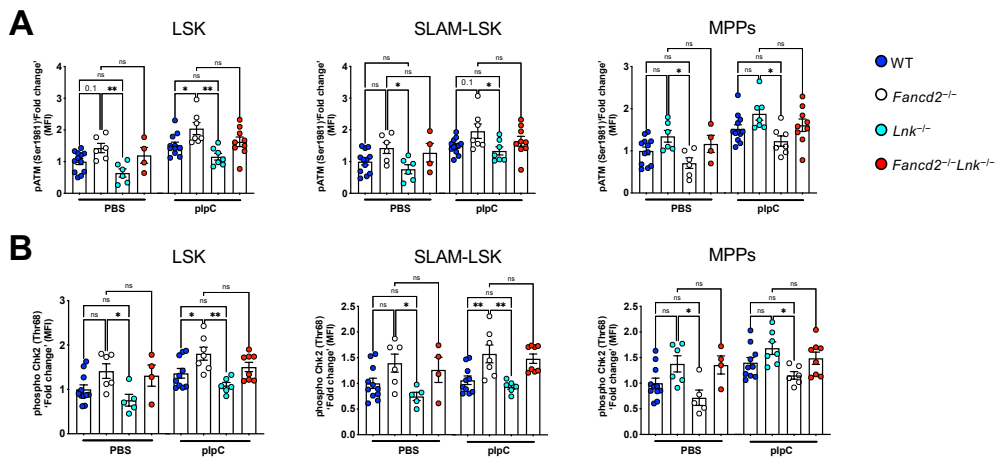

**Figure S2. Loss of *Lnk* does not reduce the activation of the ATM pathway in *Fancd2*<sup>-/-</sup> HSPCs upon pIpC-induced replication stress.** Quantification of pATM (Ser1981) (A) and pCHK2 (Thr68) (B) (fold change in MFI) within LSK, SLAM-LSK, and MPPs populations of PBS and pIpC administrated mice. Pooled data from three independent experiments are expressed as mean  $\pm$  SEM. Each symbol represents an individual mouse. Bars indicate mean values, and error bars indicate SEM. p values were calculated using one-way ANOVA, \*,  $p < 0.05$ ; \*\*,  $p < 0.01$ ; \*\*\*,  $p < 0.001$ .

**Figure S3, related to Figure 4.**

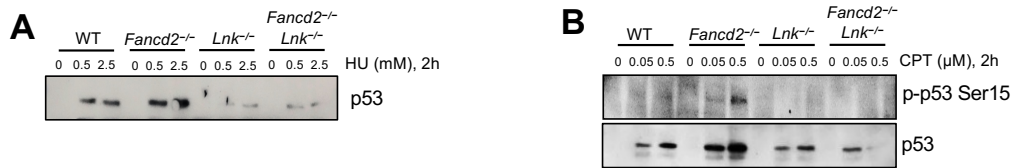

**Figure S3. *Lnk* deficiency reduces p53 activation in *Fancd2*<sup>-/-</sup> HSPCs.** Representative immunoblots showing the phosphor-p53 (p-p53) and total p53 levels in freshly sorted LK cells treated with increasing concentrations of HU (**A**) or CPT (**B**). The images in **A** and **B** were derived from the same experiment initially shown in Fig. 1H left and right panels, respectively.

**Figure S4, related to Figure 5.**

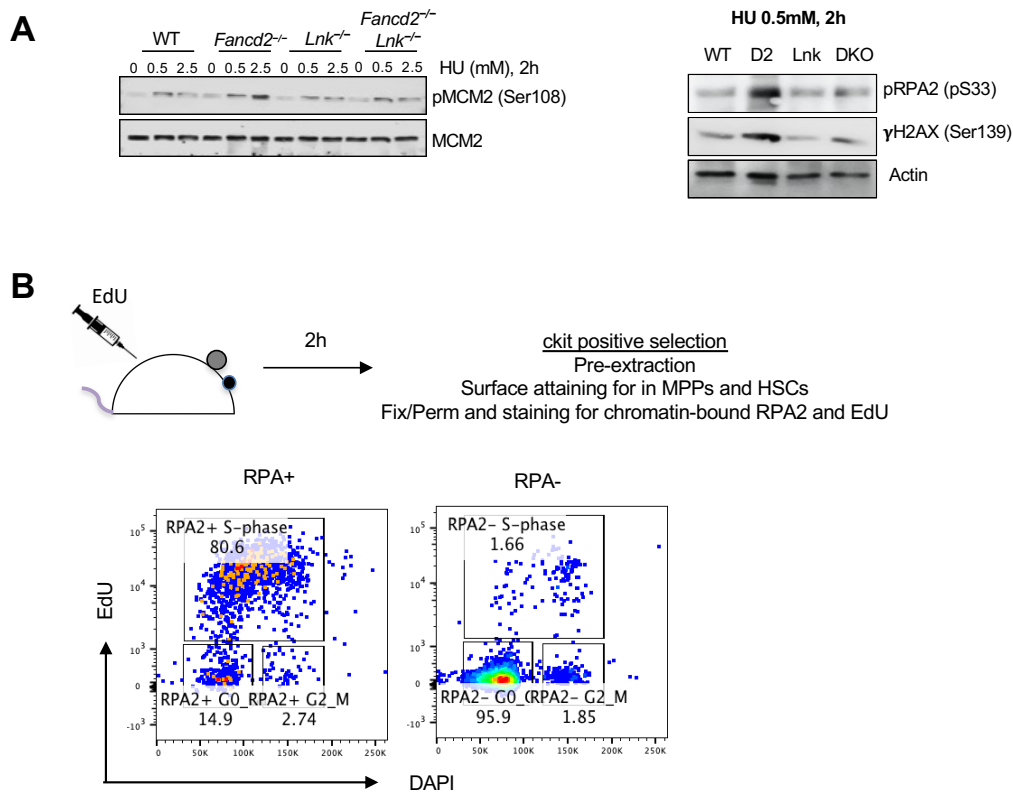

**Figure S4. *Lnk* deficiency reduces replication stress and RPA accumulates on the chromatin in the S phase.** (A) Immunoblots of whole cell lysates showing the expression of pMCM2 (Ser108) and pRPA(S33) in freshly sorted LK cells treated with a graded concentration of HU, cultured in the presence of cytokines (SCF, TPO, IL-3, IL-6) for 2h. The images were derived from the same experiment initially shown in Fig. 3G (left panel). (B) Experimental scheme to measure chromatin-bound RPA in different cell cycle phases in HSPCs in vivo. Representative flow cytometry plot showing the cell cycle of RPA+ HSCs (left) and RPA- HSCs (Right).

**Figure S5, related to Figure 6.**

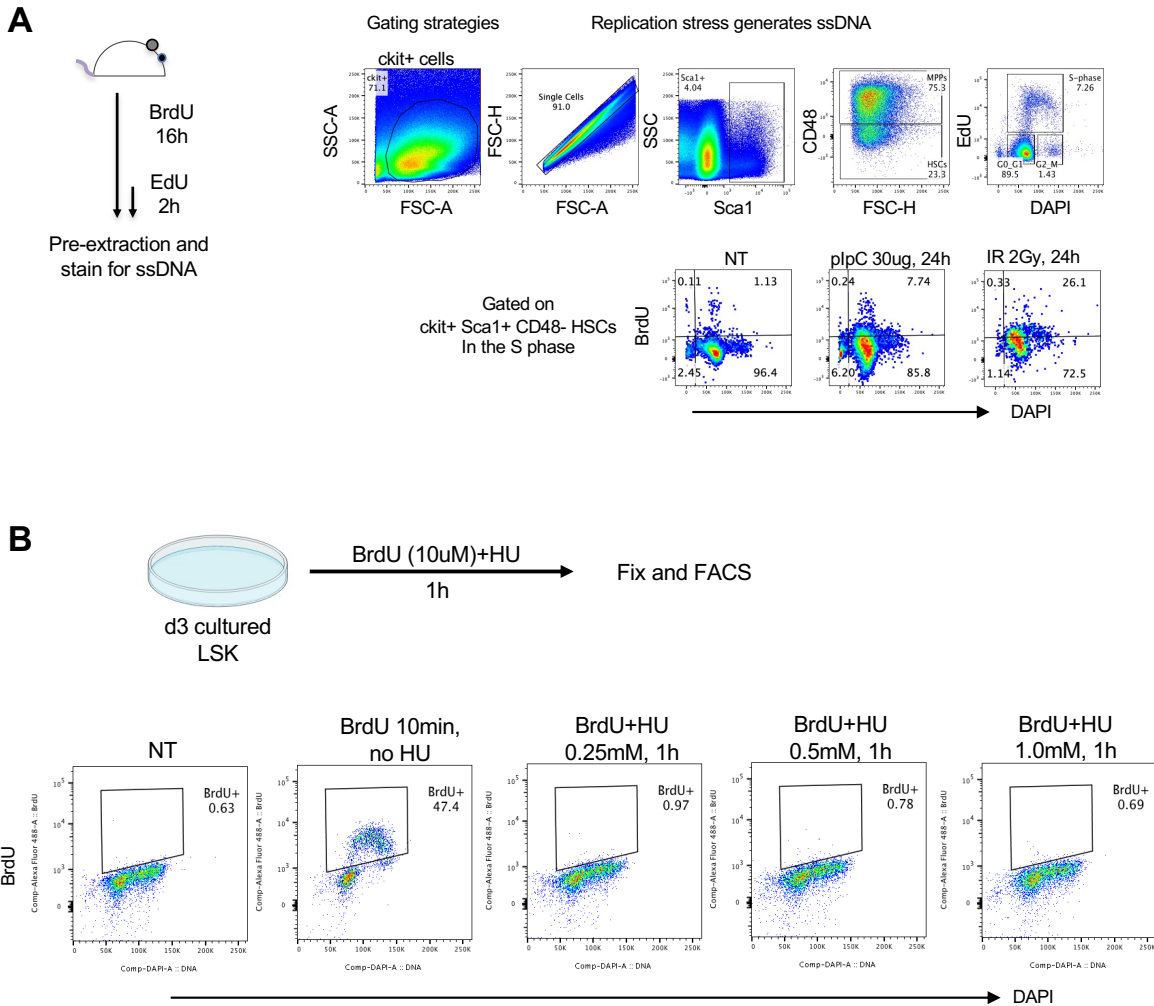

**Figure S5. A flow cytometry assay to measure ssDNA in HSPCs and titration of HU to stall replication in primary HSPCs. (A) Schematic outline of the experimental procedure for measuring replication-stress (pIpC or IR) induced ssDNA within the HSPC population (Left). Gating strategy and representative flow cytometry plots to examine ssDNA in the S phase of HSCs (Right). The S-phase cells are gated for the EdU+ population, and neutralized BrdU staining indicates ssDNA. NT: no treatment. (B) Schematic outline of the experimental procedure to titrate HU doses to stall replication for the fork recovery flow cytometry assay. Flow plots show the BrdU incorporation in cultured Kit<sup>+</sup>Sca1<sup>+</sup> HSPCs in the absence or presence of a graded dose of HU.**

**Figure S6, related to Figure 8.**

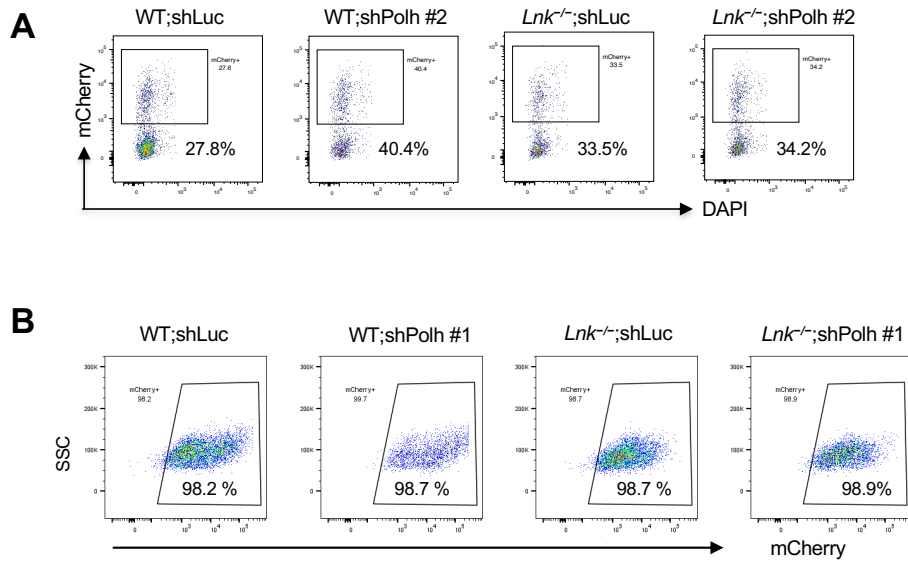

**Figure S6. Infection rates of shRNA-mediated *PolH* knockdown in HSPCs.** Flow cytometric plots showing the infection rates at the time of transplantation for two different BMTs using different shRNAs to PolH, #2 (A) and #1 (B).

**Figure S7.**

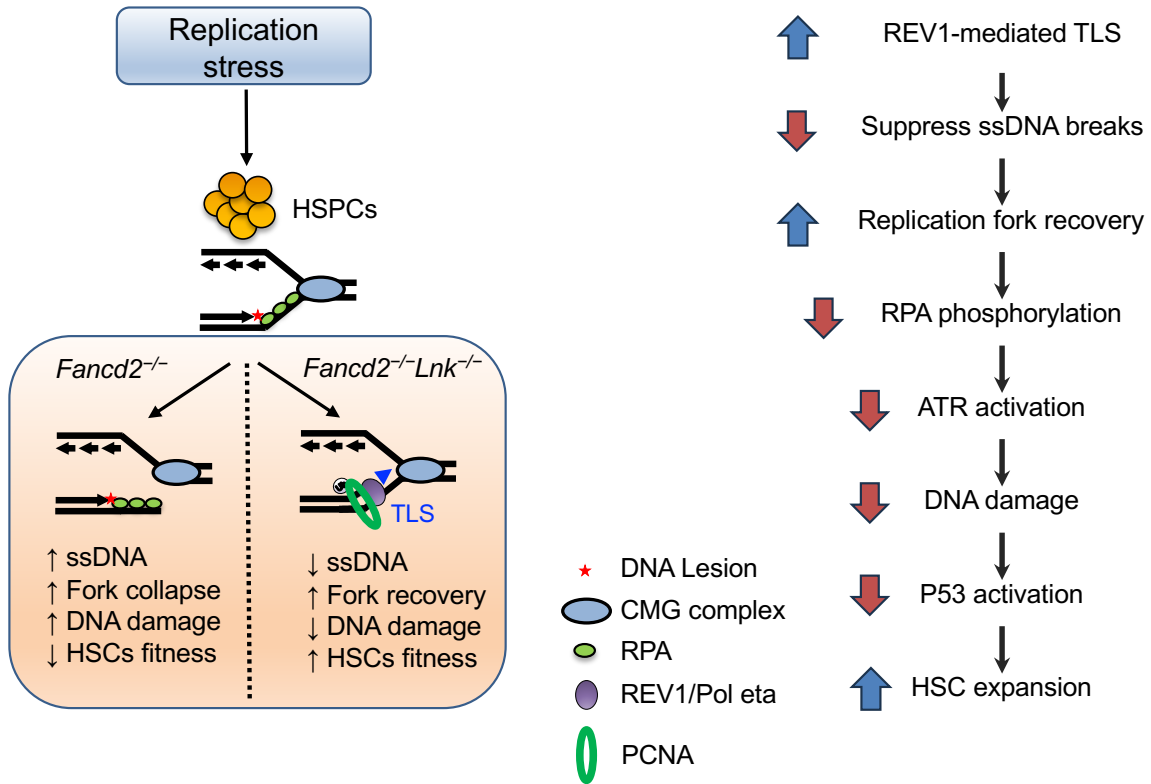

**Figure S7. Working model to show *Lnk* deficiency reduces replication stress and promotes HSC fitness via enhancing REV1-mediated TLS.**
